# Supplementary material for: Selective and reversible self-assembly of C60fullerene on a 9,10-bis(S-acetylthiomethyl)anthracene modified gold surface
Source: Royal Society of Chemistry journal article supplement (doi:10.1039/c6ra04806d), 2016-01-01
Supplement: c6ra04806d1.pdf [file c6ra04806d1.pdf]

## Electronic Supplementary Information

### Selective and reversible self-assembly of C<sub>60</sub> fullerene on 9,10-bis(S-acetylthiomethyl)anthracene modified gold surface

*P. Piotrowski, J. Pawłowska, R. Bilewicz and A. Kaim\**

Department of Chemistry, University of Warsaw, Pasteura 1, 02-093 Warsaw, Poland.

E-mail: akaim@chem.uw.edu.pl

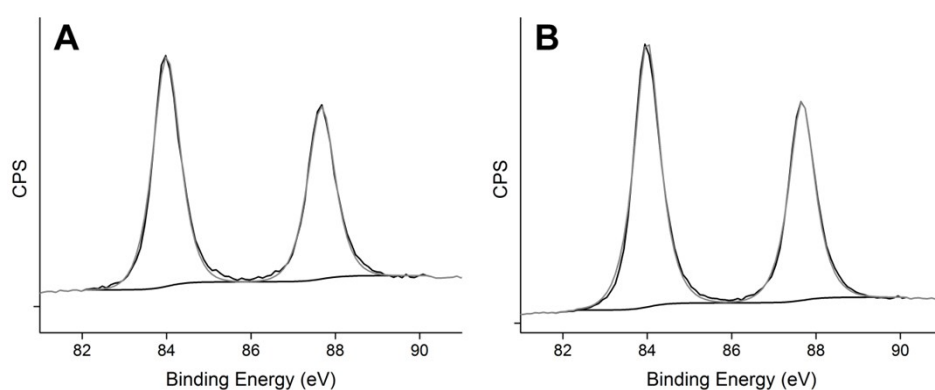

**Figure S1.** Au 4f XPS core level spectra of the ADMTA (A) and its Diels-Alder adduct with C<sub>60</sub> (B) self-assembled on the surface of gold electrode.

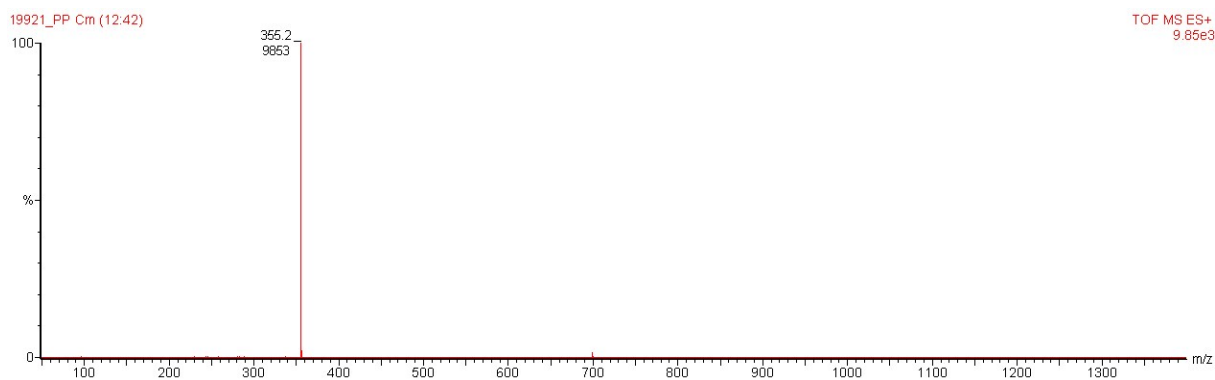

**Figure S2.** ESI-MS spectrum of 9,10-anthracenedimethanethiol diacetate as a [M + H]<sup>+</sup> cation.

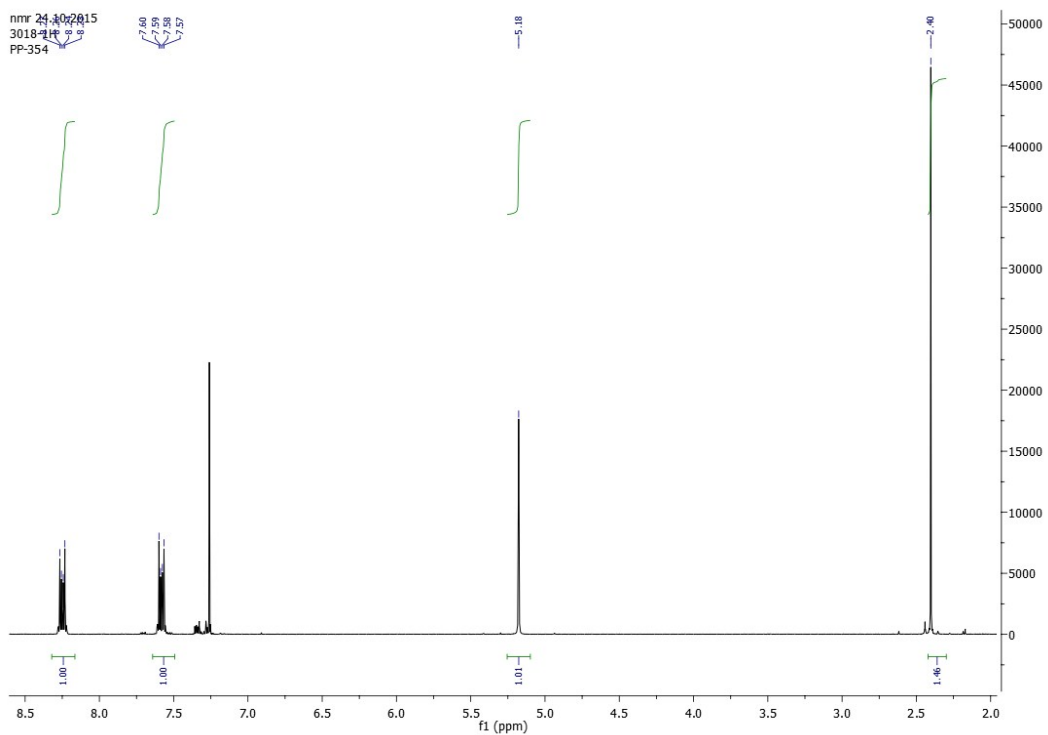

**Figure S3.**  $^1\text{H}$  NMR spectrum of 9,10-anthracenedimethanethiol diacetate in  $\text{CDCl}_3$ .

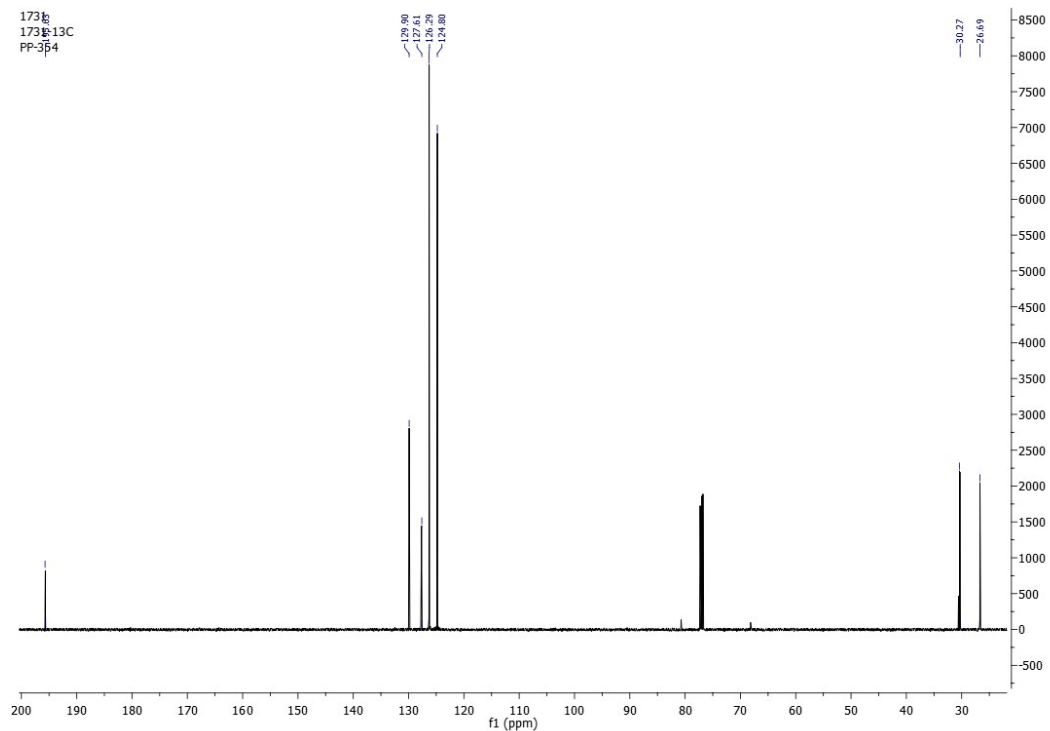

**Figure S4.**  $^{13}\text{C}$  NMR spectrum of 9,10-anthracenedimethanethiol diacetate in  $\text{CDCl}_3$ .

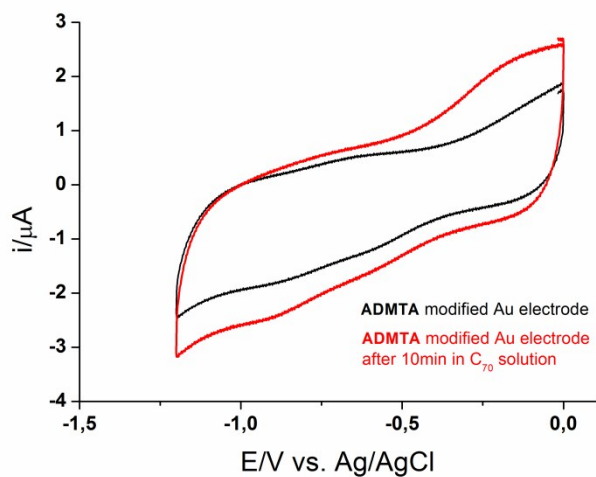

**Figure S5.** Voltammograms of ADMTA covered gold electrode before and after immersion in:  $1 \cdot 10^{-3} \text{M}$   $\text{C}_{70}$  solution. CV curves recorded in 0.1M TBAHFP solution in acetonitrile,  $\nu = 1 \text{V/s}$ .

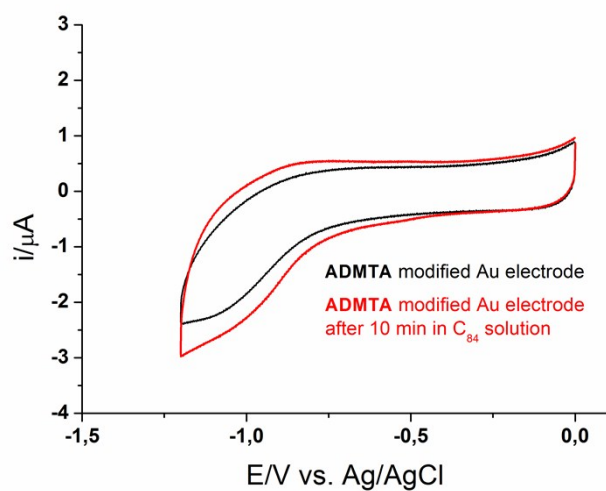

**Figure S6.** Voltammograms of ADMTA covered gold electrode before and after immersion in:  $1 \cdot 10^{-4} \text{M}$   $\text{C}_{84}$  solution. CV curves recorded in 0.1M TBAHFP solution in acetonitrile,  $\nu = 1 \text{V/s}$ .

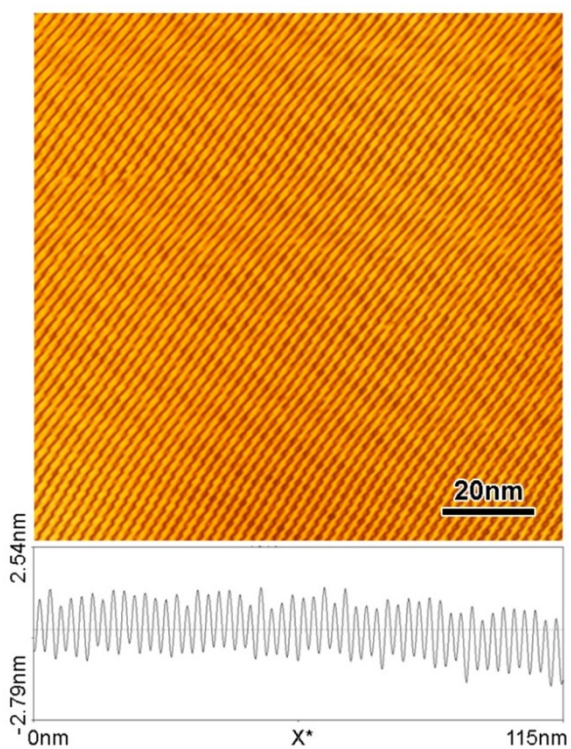

**Figure S7.** Diels-Alder adduct of ADMTA and  $C_{60}$  self-assembled on the gold surface AFM image and its cross-section.

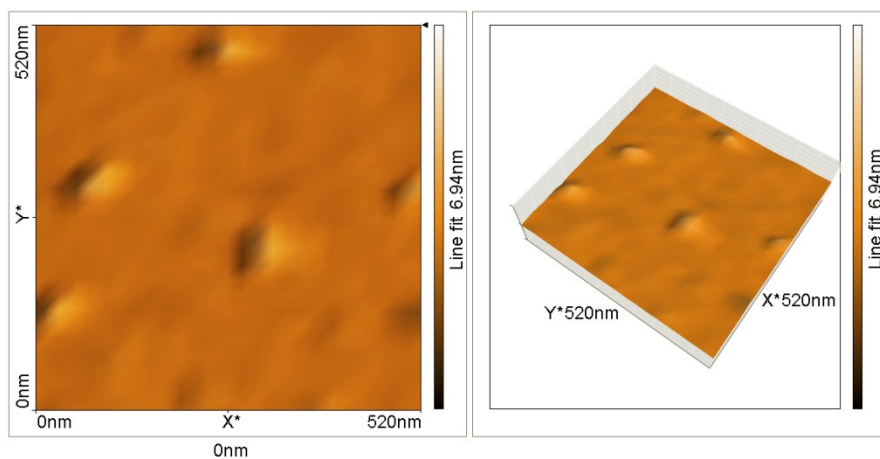

**Figure S8.** AFM image of ADMTA functionalized gold plate immersed in the  $1 \cdot 10^{-3} M$  solution of  $C_{70}$  fullerene.

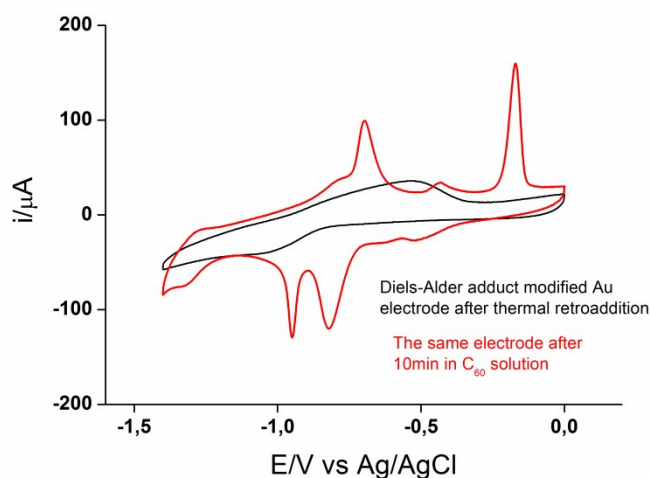

**Figure S9.** Cyclic voltammograms obtained for gold electrode after thermal retroaddition followed by immersion in  $C_{60}$  fullerene solution, recorded 0.1 M TBAHFP solution in acetonitrile,  $v = 1V/s$ .

**Table S1** Cartesian coordinates for ADMTA in Molpro format

|   |                 |                 |                 |
|---|-----------------|-----------------|-----------------|
| C | 0.172243000000  | -0.606300000000 | -0.087050000000 |
| C | 0.094983000000  | -0.480633000000 | 1.274734000000  |
| C | 1.264011000000  | -0.274637000000 | 2.079016000000  |
| C | 1.428908000000  | -0.533887000000 | -0.742045000000 |
| C | 2.572180000000  | -0.335708000000 | -0.014754000000 |
| C | 2.547070000000  | -0.197875000000 | 1.411988000000  |
| C | 1.195559000000  | -0.152187000000 | 3.486240000000  |
| C | 2.385000000000  | -0.041727000000 | 4.243666000000  |
| C | 3.668065000000  | 0.035026000000  | 3.576633000000  |
| C | 3.728632000000  | -0.000959000000 | 2.164202000000  |
| C | 2.369640000000  | -0.010620000000 | 5.676859000000  |
| C | 3.521925000000  | 0.088729000000  | 6.410108000000  |
| C | 4.778116000000  | 0.166384000000  | 5.754786000000  |
| C | 4.846264000000  | 0.140547000000  | 4.386981000000  |
| C | -0.139433000000 | -0.136052000000 | 4.187852000000  |
| S | -0.690380000000 | -1.803763000000 | 4.788719000000  |
| C | -2.293512000000 | -1.938686000000 | 3.978436000000  |
| C | -3.003578000000 | -3.246146000000 | 4.270275000000  |
| O | -2.759322000000 | -1.083539000000 | 3.254394000000  |
| C | 5.046393000000  | 0.171750000000  | 1.451181000000  |
| S | 5.895361000000  | -1.428890000000 | 1.047344000000  |
| C | 7.487633000000  | -1.175256000000 | 1.850568000000  |
| C | 8.424783000000  | -2.358679000000 | 1.708881000000  |

|   |                 |                 |                 |
|---|-----------------|-----------------|-----------------|
| O | 7.783821000000  | -0.170123000000 | 2.462506000000  |
| H | -0.731846000000 | -0.769277000000 | -0.667172000000 |
| H | -0.876286000000 | -0.562167000000 | 1.747950000000  |
| H | 1.484538000000  | -0.643178000000 | -1.821688000000 |
| H | 3.520939000000  | -0.306466000000 | -0.538097000000 |
| H | 1.425518000000  | -0.090662000000 | 6.203275000000  |
| H | 3.475171000000  | 0.100805000000  | 7.495620000000  |
| H | 5.690408000000  | 0.239408000000  | 6.340336000000  |
| H | 5.821410000000  | 0.179518000000  | 3.916322000000  |
| H | -0.120552000000 | 0.519027000000  | 5.059057000000  |
| H | -0.953151000000 | 0.207350000000  | 3.547953000000  |
| H | -4.042608000000 | -3.029924000000 | 4.537174000000  |
| H | -3.011202000000 | -3.849319000000 | 3.355207000000  |
| H | -2.526322000000 | -3.818438000000 | 5.069432000000  |
| H | 4.919203000000  | 0.704138000000  | 0.508381000000  |
| H | 5.777921000000  | 0.729922000000  | 2.036706000000  |
| H | 8.067124000000  | -3.098666000000 | 0.988847000000  |
| H | 9.410665000000  | -1.992154000000 | 1.406775000000  |
| H | 8.531056000000  | -2.837209000000 | 2.689152000000  |

Cartesian coordinates for ADMTA Diels-Alder adduct with C<sub>60</sub> fullerene in Molpro format

|   |                |                 |                 |
|---|----------------|-----------------|-----------------|
| C | 4.604028000000 | -1.567847000000 | -3.212698000000 |
| C | 4.139376000000 | -1.960257000000 | -1.955995000000 |
| C | 3.726921000000 | -0.999570000000 | -1.029713000000 |
| C | 4.628624000000 | -0.219261000000 | -3.558951000000 |
| C | 4.176868000000 | 0.741122000000  | -2.652199000000 |
| C | 3.737644000000 | 0.358864000000  | -1.381797000000 |
| C | 3.127793000000 | -1.289474000000 | 0.339600000000  |
| C | 3.737692000000 | -0.358823000000 | 1.381623000000  |
| C | 3.726934000000 | 0.999614000000  | 1.029541000000  |
| C | 3.127769000000 | 1.289511000000  | -0.339756000000 |
| C | 4.176959000000 | -0.741075000000 | 2.652012000000  |
| C | 4.628721000000 | 0.219315000000  | 3.558754000000  |
| C | 4.604076000000 | 1.567902000000  | 3.212511000000  |
| C | 4.139378000000 | 1.960305000000  | 1.955823000000  |
| C | 3.180325000000 | -2.772980000000 | 0.746181000000  |
| S | 4.875083000000 | -3.455325000000 | 1.010471000000  |
| C | 4.788509000000 | -4.956546000000 | 0.015824000000  |
| C | 6.017224000000 | -5.832780000000 | 0.156865000000  |
| O | 3.845488000000 | -5.245681000000 | -0.689999000000 |
| C | 3.180283000000 | 2.773012000000  | -0.746350000000 |

|   |                 |                 |                 |
|---|-----------------|-----------------|-----------------|
| S | 4.875001000000  | 3.455398000000  | -1.010707000000 |
| C | 4.788558000000  | 4.956438000000  | -0.015872000000 |
| C | 6.017781000000  | 5.832157000000  | -0.155802000000 |
| O | 3.845417000000  | 5.245767000000  | 0.689722000000  |
| H | 4.932760000000  | -2.322110000000 | -3.922277000000 |
| H | 4.084937000000  | -3.016805000000 | -1.725317000000 |
| H | 4.980295000000  | 0.090311000000  | -4.539195000000 |
| H | 4.166266000000  | 1.781622000000  | -2.957478000000 |
| H | 4.166388000000  | -1.781576000000 | 2.957285000000  |
| H | 4.980431000000  | -0.090253000000 | 4.538986000000  |
| H | 4.932802000000  | 2.322168000000  | 3.922089000000  |
| H | 4.084870000000  | 3.016855000000  | 1.725166000000  |
| H | 2.638054000000  | -2.924134000000 | 1.680340000000  |
| H | 2.728036000000  | -3.419830000000 | -0.008913000000 |
| H | 5.754894000000  | -6.704448000000 | 0.767727000000  |
| H | 6.308843000000  | -6.192813000000 | -0.834118000000 |
| H | 6.855255000000  | -5.312800000000 | 0.627744000000  |
| H | 2.637992000000  | 2.924153000000  | -1.680501000000 |
| H | 2.727998000000  | 3.419886000000  | 0.008730000000  |
| H | 5.753749000000  | 6.708779000000  | -0.758754000000 |
| H | 6.314093000000  | 6.184489000000  | 0.836600000000  |
| H | 6.853283000000  | 5.314766000000  | -0.633925000000 |
| C | -1.549974000000 | 0.909926000000  | 3.326021000000  |
| C | -2.945061000000 | 0.915326000000  | 3.345932000000  |
| C | -1.550085000000 | -0.909911000000 | -3.326021000000 |
| C | -0.824892000000 | -0.341664000000 | 3.205641000000  |
| C | -1.531076000000 | -1.545711000000 | 3.112640000000  |
| C | -1.089174000000 | -2.546155000000 | 2.173314000000  |
| C | -2.982583000000 | -1.543073000000 | 3.118293000000  |
| C | 0.352621000000  | -0.110932000000 | 2.396237000000  |
| C | 0.788610000000  | -1.070445000000 | 1.509447000000  |
| C | 0.352146000000  | 1.315859000000  | 2.006469000000  |
| C | -3.676388000000 | -0.336485000000 | 3.230708000000  |
| C | -4.850048000000 | -0.094068000000 | 2.414666000000  |
| C | -3.436561000000 | -2.554771000000 | 2.176854000000  |
| C | -5.286210000000 | -1.065028000000 | 1.510312000000  |
| C | -4.849694000000 | 1.309989000000  | 2.030094000000  |
| C | -3.676590000000 | 1.934342000000  | 2.609633000000  |
| C | -2.982532000000 | 2.915239000000  | 1.898383000000  |
| C | -5.285984000000 | 1.685492000000  | 0.757549000000  |
| C | -3.436491000000 | 3.306698000000  | 0.573117000000  |
| C | -1.531015000000 | 2.915128000000  | 1.892391000000  |

|   |                 |                 |                 |
|---|-----------------|-----------------|-----------------|
| C | -2.262732000000 | -3.177896000000 | 1.591743000000  |
| C | 0.030277000000  | -2.286292000000 | 1.376748000000  |
| C | 1.567375000000  | -0.784884000000 | 0.213126000000  |
| C | -0.824854000000 | 1.926259000000  | 2.585643000000  |
| C | 0.786152000000  | 1.689326000000  | 0.754257000000  |
| C | -1.089439000000 | 3.297425000000  | 0.574650000000  |
| C | -2.262687000000 | -3.545870000000 | 0.247572000000  |
| C | 0.030486000000  | -2.669196000000 | -0.021419000000 |
| C | -4.564975000000 | -2.319592000000 | 1.388619000000  |
| C | -1.089448000000 | -3.297408000000 | -0.574667000000 |
| C | -3.436499000000 | -3.306691000000 | -0.573053000000 |
| C | 0.786135000000  | -1.689306000000 | -0.754339000000 |
| C | -4.565018000000 | -2.703376000000 | -0.014107000000 |
| C | 1.567360000000  | 0.784907000000  | -0.213233000000 |
| C | 0.030477000000  | 2.669215000000  | 0.021363000000  |
| C | 0.352082000000  | -1.315838000000 | -2.006535000000 |
| C | 0.788555000000  | 1.070466000000  | -1.509527000000 |
| C | 0.030222000000  | 2.286312000000  | -1.376803000000 |
| C | -5.732978000000 | -0.673128000000 | 0.184349000000  |
| C | -5.732987000000 | 0.673128000000  | -0.184205000000 |
| C | -5.286004000000 | -1.685490000000 | -0.757421000000 |
| C | -4.565027000000 | 2.703380000000  | 0.014210000000  |
| C | -5.286266000000 | 1.065030000000  | -1.510184000000 |
| C | -4.849759000000 | -1.309986000000 | -2.029981000000 |
| C | -4.565031000000 | 2.319596000000  | -1.388516000000 |
| C | -2.262707000000 | 3.545882000000  | -0.247548000000 |
| C | -2.262797000000 | 3.177908000000  | -1.591719000000 |
| C | -4.850131000000 | 0.094070000000  | -2.414553000000 |
| C | -3.436645000000 | 2.554778000000  | -2.176789000000 |
| C | -1.089257000000 | 2.546171000000  | -2.173331000000 |
| C | -1.531070000000 | -2.915113000000 | -1.892392000000 |
| C | -2.982587000000 | -2.915230000000 | -1.898335000000 |
| C | 0.352539000000  | 0.110953000000  | -2.396304000000 |
| C | -0.824936000000 | -1.926242000000 | -2.585668000000 |
| C | -3.676672000000 | -1.934335000000 | -2.609560000000 |
| C | -2.945172000000 | -0.915317000000 | -3.345884000000 |
| C | -0.825003000000 | 0.341680000000  | -3.205666000000 |
| C | -1.531188000000 | 1.545725000000  | -3.112641000000 |
| C | -2.982695000000 | 1.543082000000  | -3.118244000000 |
| C | -3.676500000000 | 0.336491000000  | -3.230635000000 |
